# Supplementary material for: Targeting Conserved Pathways in 3D Spheroid Formation of Diverse Cell Types for Translational Application: Enhanced Functional and Antioxidant Capacity
Source: Cells. 2023 Aug 11;12(16):2050. doi: 10.3390/cells12162050 (PMC10453086; doi:10.3390/cells12162050)
Supplement: Supplementary file 1 [file cells-12-02050-s001.zip]

Archive with 8 entries (8 files):
- Sup information.pdf
- SupFig1.TIF
- SupFig2.TIF
- SupFig3.TIF
- SupFig4.TIF
- SupFig5.TIF
- Table S1.xlsx
- Table S2.xlsx
