# Supplementary material for: Targeting Conserved Pathways in 3D Spheroid Formation of Diverse Cell Types for Translational Application: Enhanced Functional and Antioxidant Capacity
Source: Cells. 2023 Aug 11;12(16):2050. doi: 10.3390/cells12162050 (PMC10453086; doi:10.3390/cells12162050)
Supplement: Supplementary file 1 [file cells-12-02050-s001.zip › Table S1.xlsx]

## Sheet: 工作表1
Table S1 of Key Resources
Experimental Models: Mouse Cell Lines	Source
Mouse ESC (mESC)	ATCC (Cat#: CRL-1934)
Murine mesenchymal stem cell M210B4	ATCC (Cat#: CRL-1972)
Murine lung adenocarcinoma cell (LLC)	ATCC (Cat#: CRL-1642)
Experimental Models: Human Cell Lines	Source
human lung adenocarcinoma cell line SK-MES-1	ATCC (Cat#: HTB-58)
Human iPSCs	BCRC (Cat#: SC81031)
Human placenta-derived MSCs (P-MSCs)	Our lab (Yen et al., 2005)
Cell culture reagents	Source
DMEM-low glucose	Thermo Fisher (Cat#: 11885084)
DMEM-high glucose	Thermo Fisher (Cat#: 11965118)
RPMI-1640	Thermo Fisher (Cat#: 22400089)
Fetal bovine serum (FBS)	Thermo Fisher (Cat#: 10082147)
Non-essential amino acids (NEAA)	Thermo Fisher (Cat#: 11140050)
Sodium pyruvate	Thermo Fisher (Cat#: 11360070)
L-glutamine	Thermo Fisher (Cat#: A2916801)
β-mercaptoethanol	Thermo Fisher (Cat#: 31350010)
Antibiotics (Penicillin-Streptomycin)	Thermo Fisher (Cat#: 10378016)
PBS	Sigma-Aldrich (Cat#: P5493)
Leukemia inhibitory factor (LIF)	MilliporeSigma (Cat#: ESG1107)
mTeSR™1	StemCell technologies (Cat#: 85850)
Agarose	Focus Bioscience (Cat#: MB755-0500)
Cholesterol modification associated reagents	Source	Use dose
Mevastatin	Sigma-Aldrich (Cat#: M2537)	1 mM
Methyl-beta-cyclodextrin (MβCD)	Sigma-Aldrich (Cat#: C4555)	1.5mM
Cholesterol	Sigma-Aldrich (Cat#: C3045)	100 mg/ml
Cytoskeleton modification associated reagents	Source	Use dose
Blebbistatin	Sigma-Aldrich (Cat#: B0560)	1 mM
Cytochalasin D	Sigma-Aldrich (Cat#: C8273)	1 mM
Cytoskeleton modification associated reagents	Source	Use dose
H2O2	Sigma-Aldrich (Cat#: 386790-M)	500 mM
Chemical and Commercial Assays	Source
Rhodamine phalloidin	Thermo Fisher (Cat#: R415)
RevertAid H Minus reverse transcriptase	Thermo Fisher (Cat#: K1691)
DAPI	Thermo Fisher (Cat#: D1306)
Ethanol	Sigma-Aldrich (Cat#: 459844)
Triton X-100	Sigma-Aldrich (Cat#: X100)
RNase A	Sigma-Aldrich (Cat#: R6513)
Propidium iodide	Sigma-Aldrich (Cat#: 79214)
Paraformaldehyde	Sigma-Aldrich (Cat#: 158127)
MTT	Sigma-Aldrich (Cat#: M5655)
TRI reagent	Sigma-Aldrich (Cat#: 93289)
SYBR Fast qPCR kit	MilliporeSigma (Cat#: SF1UKB)
RNeasy Mini Kits	Qiagen (Cat#: 74106)
mouse Gene 2.0 ST array	Affymetrix
Software	Source
ImageJ	https://imagej.nih.gov/ij/
FIJI	https://imagej.net/Fiji
Morpheus	https://software.broadinstitute.org/morpheus/
Gene Set Enrichment Analysis (GSEA)	https://www.gsea-msigdb.org/gsea/index.jsp
CellQuest software	BD
GeneChip Command Console software	Affymetrix
Ingenuity Pathway Analysis (IPA)	Qiagen
Metascape	http://metascape.org/gp/index.html#/main/step1
Partek Genomics Suite software	Chesterfield
Equtiment	Source
IX73 inverted microscope	Olympus
Leica TCS SP5	Leica Microsystems
FACSCalibur	BD
NanoDrop spectrophotometer	Nyxor Biotech
ABI PRISM 7500 system	Applied Biosystem
SpectraMAX 250 microplate reader	Molecular Devices
