# Supplementary material for: Targeting Conserved Pathways in 3D Spheroid Formation of Diverse Cell Types for Translational Application: Enhanced Functional and Antioxidant Capacity
Source: Cells. 2023 Aug 11;12(16):2050. doi: 10.3390/cells12162050 (PMC10453086; doi:10.3390/cells12162050)
Supplement: Supplementary file 1 [file cells-12-02050-s001.zip › Table S2.xlsx]

## Sheet: 工作表1
Table S2: Primer list
Gene Name	Primer	Sequence (5' to 3')
Gapdh	F	CCAGCTACTCGCGGCTTTAC
	R	AATCCGTTCACACCGACCTT
Pou5f1	F	CACGAGTGGAAAGCAACTCA
	R	AGATGGTGGTCTGGCTGAAC
Sox2	F	AAGGGTTCTTGCTGGGTTTT
	R	AGACCACGAAAACGGTCTTG
Nanog	F	AAGTACCTCAGCCTCCAGCA
	R	AGATGGTGGTCTGGCTGAAC
Gfap	F	AGAACAACCTGGCTGCGTATAG
	R	TCTGCAAACTTAGACCGATACCA
T	F	CAAGAACGGCAGGAGGATGT
	R	GTACATGGCATTGGGGTCCA
Sox17	F	ATGCATTCTGGACCCGCTAC
	R	AGCTCTCCTGCCTCTCAGAA
Hmox1	F	GAACCCAGTCTATGCCCCAC
	R	GGCGTGCAAGGGATGATTTC
Tgfb1	F	AACAATTCCTGGCGTTACCTT
	R	GAATCGAAAGCCCTGTATTCC
Mmp3	F	GTTCTGGGCTATACGAGGGC
	R	TTCTTCACGGTTGCAGGGAG
Ptges	F	CATCCTCACAAGAGGCCCAG
	R	GCACTCAAAGGACGGTGGTA
Areg	F	TGGCATCGGCATCGTTATCA
	R	GTGACAACTGGGCATCTGGA
Itga2	F	GAAGGGCCAACAGCCTACAT
	R	AATGAGGGGCAAACGGTAGG
Pvr	F	CAAACAGCACAAGGTGACGG
	R	AGGGTTCCAGTTGCTATGCC
Msmo1	F	TGCTCTGGTCTGGGTTTGAC
	R	CAAGGGGTGGACAGTGGAAG
Dhcr24	F	TGAAGGGGTTGGAGTTCGTTC
	R	CCCTGTTCCTTCCATTCCCG
Sqle	F	ATCCTTCTACGCTCCCGACT
	R	GGACACGGGCCTCTCTATTG
Nfe2l2	F	AAAGCACAGCCAGCACATTC
	R	GGGATTCACGCATAGGAGCA
